# Supplementary material for: Grant application outcomes for biomedical researchers who participated in the National Research Mentoring Network’s Grant Writing Coaching Programs
Source: PubMed Central journal article supplement (PMC7652313; doi:10.1371/journal.pone.0241851), 2020-11-09
Supplement: pone.0241851.s001.pdf [file pone.0241851.s001.pdf]

|                                                                                                                                                                                                                                                                                                                                                                                                                                                                                                                                                                         |
|-------------------------------------------------------------------------------------------------------------------------------------------------------------------------------------------------------------------------------------------------------------------------------------------------------------------------------------------------------------------------------------------------------------------------------------------------------------------------------------------------------------------------------------------------------------------------|
| <b>Pre-Program Activities</b>                                                                                                                                                                                                                                                                                                                                                                                                                                                                                                                                           |
| <ul style="list-style-type: none"> <li>• Writing assignment: Due January 3, 2018 <ul style="list-style-type: none"> <li>○ Updated <i>Specific Aims</i> page and <i>Biosketch</i></li> </ul> </li> <li>• Review video of rhetorical patterns and <i>Specific Aims</i> examples from successful proposals</li> </ul>                                                                                                                                                                                                                                                      |
| <b>Kickoff @ U of MN Minneapolis campus: January 8-9, 2018</b>                                                                                                                                                                                                                                                                                                                                                                                                                                                                                                          |
| <ul style="list-style-type: none"> <li>• Introduction to NRMN-P<sup>3</sup></li> <li>• Review of participants' <i>Specific Aims</i> and <i>Biosketches</i></li> <li>• Early-stage investigator panel</li> <li>• Document design principles</li> <li>• Individual meetings with coaches</li> <li>• Discussion with NIH officials</li> <li>• Prep for future sessions</li> </ul>                                                                                                                                                                                          |
| <b>Virtual meeting 1: January 25, 2018, 1-3pm CST</b>                                                                                                                                                                                                                                                                                                                                                                                                                                                                                                                   |
| <ul style="list-style-type: none"> <li>• Writing assignment: Due January 22, 2018 <ul style="list-style-type: none"> <li>○ Revised <i>Aims</i> + <i>Significance</i></li> </ul> </li> </ul>                                                                                                                                                                                                                                                                                                                                                                             |
| <b>Virtual meeting 2: February 8, 2018 1-3pm CST</b>                                                                                                                                                                                                                                                                                                                                                                                                                                                                                                                    |
| <ul style="list-style-type: none"> <li>• Writing assignment: Due February 5, 2018 <ul style="list-style-type: none"> <li>○ R's: Revised draft-to-date + outline of <i>Approach</i></li> <li>○ K's (additional): <i>Candidate Background</i></li> </ul> </li> </ul>                                                                                                                                                                                                                                                                                                      |
| <b>Virtual meeting 3: March 1, 2018 1-3pm CST</b>                                                                                                                                                                                                                                                                                                                                                                                                                                                                                                                       |
| <ul style="list-style-type: none"> <li>• Writing assignment: Due February 26, 2018 <ul style="list-style-type: none"> <li>○ R's: Revised draft-to-date + <i>Innovation</i> + <i>Preliminary Work</i> section of <i>Approach</i></li> <li>○ K's (additional): Revised <i>Candidate Background</i> + <i>Career Goals &amp; Objectives</i></li> </ul> </li> </ul>                                                                                                                                                                                                          |
| <b>Virtual meeting 4: March 15, 2018 1-3pm CST</b>                                                                                                                                                                                                                                                                                                                                                                                                                                                                                                                      |
| <ul style="list-style-type: none"> <li>• Writing assignment: Due March 12, 2018 <ul style="list-style-type: none"> <li>○ R's: Revised draft-to-date + expanded <i>Approach</i> (building from outline)</li> <li>○ K's (additional): Revised <i>Career Goals &amp; Objectives</i> + <i>Training Activities</i></li> </ul> </li> </ul>                                                                                                                                                                                                                                    |
| <b>Virtual meeting 5: March 29, 2018 1-3pm CST</b>                                                                                                                                                                                                                                                                                                                                                                                                                                                                                                                      |
| <ul style="list-style-type: none"> <li>• Writing assignment: Due March 26, 2018 <ul style="list-style-type: none"> <li>○ R's: Revised draft-to-date + expanded <i>Approach</i></li> <li>○ K's (additional): Revised <i>Training Activities</i> + <i>Training in RCR</i></li> </ul> </li> </ul>                                                                                                                                                                                                                                                                          |
| <b>Virtual meeting 6: April 12, 2018, 1-3pm CST</b>                                                                                                                                                                                                                                                                                                                                                                                                                                                                                                                     |
| <ul style="list-style-type: none"> <li>• Writing assignment: Due April 9, 2018 <ul style="list-style-type: none"> <li>○ R's: Revised draft-to-date + expanded <i>Approach</i>, must include <i>Data Analysis</i> and brief paragraph(s) on <i>Potential Problems and Alternative Approaches</i></li> <li>○ K's (additional): Revised <i>Training in RCR</i></li> </ul> </li> </ul>                                                                                                                                                                                      |
| <b>Virtual meeting 7: April 26, 2018 1-3pm CST</b>                                                                                                                                                                                                                                                                                                                                                                                                                                                                                                                      |
| <ul style="list-style-type: none"> <li>• Writing assignment: Due April 23, 2018 <ul style="list-style-type: none"> <li>○ R's and K's: All prior sections revised</li> <li>○ Revised <i>Biosketch</i></li> <li>○ Optional to submit other sections</li> </ul> </li> </ul>                                                                                                                                                                                                                                                                                                |
| <b>Mock Study Section @ U of MN Minneapolis campus: May 15, 2018 (reviewers call in)</b>                                                                                                                                                                                                                                                                                                                                                                                                                                                                                |
| <ul style="list-style-type: none"> <li>• Writing assignment: Final draft for Practice Study Section, Due May 4, 2018 <ul style="list-style-type: none"> <li>○ <u>Required</u>: PI <i>Biosketch</i>, <i>Specific Aims</i>, <i>Research Strategy</i>, K-specific sections completed during P3</li> <li>○ <u>Optional</u>: <i>Budget and Justification</i>, <i>Resources</i>, <i>Human Subjects/Vertebrate Animals</i>, <i>Environment</i> and <i>Institutional Commitment to Candidate</i> (K's), etc.</li> </ul> </li> <li>• Individual meetings with coaches</li> </ul> |
| <b>Post-Program Activities</b>                                                                                                                                                                                                                                                                                                                                                                                                                                                                                                                                          |
| <ul style="list-style-type: none"> <li>• Participant follow-up phone call with mock reviewer as needed</li> <li>• Individualized support from coaches as needed</li> </ul>                                                                                                                                                                                                                                                                                                                                                                                              |
